# Supplementary material for: A SiPM-Based Trinal Spectral Sensor Developed for Detecting Hazardous Discharges in High-Voltage Switchgear
Source: Hindawi journal article supplement (doi:10.1155/2020/2068280), 2020-01-28
Supplement: f1 [file 2068280.f1.zip]

Archive with 5 entries (4 files):
- data/
- data/data1.csv
- data/data2.csv
- data/data3.csv
- data/data4.csv
