# Supplementary material for: A SiPM-Based Trinal Spectral Sensor Developed for Detecting Hazardous Discharges in High-Voltage Switchgear
Source: Hindawi journal article supplement (doi:10.1155/2020/2068280), 2020-01-28
Supplement: f1 [file 2068280.f1.zip › data/data1.csv]

voltage	UV	VIS	NIR	FULL		PD level
4.5	0.277136258660508	0.615088529638183	0.107775211701309	6.495	4.5	28.0938334035679	0.450563204005006
5	0.271186440677966	0.633898305084746	0.0949152542372881	7.375	5	41.0169967692092	0.427807486631016
5.5	0.302013422818792	0.608501118568233	0.0894854586129754	8.94	5.5	55.4853209720466	0.496323529411765
6	0.337674867342016	0.565846599131693	0.0964785335262904	10.365	6	76.8366343587583	0.596760443307758
6.5	0.349084716900809	0.55725840783312	0.0936568752660707	11.745	6.5	92.850119398792	0.626432391138274
7	0.390167772142021	0.523995317986734	0.0858369098712446	12.815	7	149.009692372524	0.744601638123604
7.5	0.425531914893617	0.482269503546099	0.0921985815602837	14.1	7.5	154.572271386431	0.882352941176471
8	0.437580437580438	0.459459459459459	0.102960102960103	15.54	8	181.036662452592	0.952380952380952
8.5	0.440196930205618	0.438169707500724	0.121633362293658	17.265	8.5	191.150442477876	1.00462656972902
9	0.429319371727749	0.445026178010471	0.12565445026178	19.1	9	249.810366624526	0.964705882352941
9.5	0.418799441600745	0.450907398790135	0.130293159609121	21.49	9.5	289.436718640259	0.928792569659443
10	0.414623272403032	0.447168970129291	0.138207757467677	22.43	10	314.271667369013	0.927218344965105
10.5	0.417021276595745	0.434042553191489	0.148936170212766	23.5	10.5	321.210844219694	0.96078431372549
11	0.413003475771826	0.427519934573707	0.159476589654467	24.455	11	329.245680573114	0.966044954567193
11.5	0.410476935105551	0.425332290852228	0.16419077404222	25.58	11.5	334.17614833544	0.965073529411765
12	0.410058027079304	0.427466150870406	0.16247582205029	25.85	12	369.518190757129	0.959276018099548
12.5	0.40510127531883	0.433608402100525	0.161290322580645	26.66	12.5	383.284169124877	0.934256055363322
13	0.403571428571429	0.425	0.171428571428571	28	13	429.301868239921	0.949579831932773
13.5	0.395738203957382	0.428378149839337	0.175883646203281	29.565	13.5	483.77581120944	0.923805763916305
14	0.390117035110533	0.431079323797139	0.178803641092328	30.76	14	537.266470009833	0.904977375565611
14.5	0.380776907723016	0.441117764471058	0.178105327805927	32.565	14.5	611.012782694199	0.863209189001044
15	0.377073906485671	0.435897435897436	0.187028657616893	33.15	15	764.433206911083	0.865051903114187
15.5	0.370697263901147	0.435127978817299	0.194174757281553	33.99	15.5	893.805309734513	0.851926977687627
16	0.367614879649891	0.433989788475565	0.198395331874544	34.275	16	964.812473662031	0.847058823529412
16.5	0.369461682782508	0.434261798239284	0.196276518978208	34.645	16.5	1039.4016013485	0.850780990362247
17	0.372881355932203	0.432203389830508	0.194915254237288	35.4	17	1144.54277286136	0.862745098039216
17.5	0.380714186466583	0.427539252466305	0.191746561067111	35.985	17.5	1309.52380952381	0.890477738056549
