# Supplementary material for: A SiPM-Based Trinal Spectral Sensor Developed for Detecting Hazardous Discharges in High-Voltage Switchgear
Source: Hindawi journal article supplement (doi:10.1155/2020/2068280), 2020-01-28
Supplement: f1 [file 2068280.f1.zip › data/data3.csv]

arc length	UV	VIS	NIR
0.2	41	131	13
0.5	45	135	16
0.7	49	159	17
1	56	185	19
1.2	68	229	22
1.5	76	243	23
1.7	75	241	22
2	64	214	20
2.2	57	195	18
2.5	49	162	17
