# Supplementary material for: A SiPM-Based Trinal Spectral Sensor Developed for Detecting Hazardous Discharges in High-Voltage Switchgear
Source: Hindawi journal article supplement (doi:10.1155/2020/2068280), 2020-01-28
Supplement: f1 [file 2068280.f1.zip › data/data4.csv]

arc length	UV	VIS	NIR	FULL	arc length	Current	Voltage	Power
0.2	0.221621621621622	0.708108108108108	0.0702702702702703	185	0.2	1.35	300	405	0.312977099236641
0.5	0.229591836734694	0.688775510204082	0.0816326530612245	196	0.5	1.23	480	590.4	0.333333333333333
0.7	0.217777777777778	0.706666666666667	0.0755555555555556	225	0.7	1.59	600	954	0.308176100628931
1	0.215384615384615	0.711538461538462	0.0730769230769231	260	1	1.69	640	1081.6	0.302702702702703
1.2	0.213166144200627	0.717868338557994	0.0689655172413793	319	1.2	2.32	690	1600.8	0.296943231441048
1.5	0.222222222222222	0.710526315789474	0.0672514619883041	342	1.5	3.27	730	2387.1	0.312757201646091
1.7	0.22189349112426	0.71301775147929	0.0650887573964497	338	1.7	3.25	760	2470	0.311203319502075
2	0.214765100671141	0.718120805369127	0.0671140939597315	298	2	2.03	750	1522.5	0.299065420560748
2.2	0.211111111111111	0.722222222222222	0.0666666666666667	270	2.2	1.76	780	1372.8	0.292307692307692
2.5	0.214912280701754	0.710526315789474	0.0745614035087719	228	2.5	1.45	710	1029.5	0.302469135802469
